# Supplementary material for: Molecular, physiological and phylogenetic traits of Lactococcus 936-type phages from distinct dairy environments
Source: PubMed Central journal article supplement (PMC6105707; doi:10.1038/s41598-018-30371-3), 2018-08-22
Supplement: 41598_2018_30371_MOESM1_ESM.pdf [file 41598_2018_30371_MOESM1_ESM.pdf]

## **Supplementary Figures**

Molecular, physiological and phylogenetic traits of *Lactococcus* 936-type phages from distinct dairy environments

Chmielewska-Jeznach M, Bardowski JK, Szczepankowska AK

**Supplementary Figure S1.** Multiple sequence alignment of putative DNA polymerase subunits of *Lactococcus* phages sequenced in this study and phages bIBB29, R3.4 and P680 as the nearest homologues. Similar residues are coloured according to their conservation based on BLOSUM62 scoring (max: 3.0, light blue; low: 0.5, grey).

```

Eg1      MTS3SLFDK3VSTAKELKES3dDFAG3G3LL3---W3NV3kDIL3PKG3SLGLITGSEK3SMK3SSLAQDLA3Q
bIBB29  MTS3SLFDK3VSTAKELKES3dDFAG3G3LL3---W3NV3kDIL3PKG3SLGLITGSEK3SMK3SSLAQDLA3Q
5g1     MTS3SLFDK3VSTAKELKES3EDFSG3G3LL3---W3NV3QDIL3PKG3SLGLITGSEK3SMK3SSLAQDLA3Q
24tp1  MTS3SLFDK3VSTAKELKES3EDFSG3G3LL3---W3NV3QDIL3PKG3SLGLITGSEK3SMK3SSLAQDLA3Q
77s    MTS3SLFDK3VSTAKELKES3EDFSG3G3LL3---W3NV3QDIL3PKG3SLGLITGSEK3SMK3SSLAQDLA3Q
14s    MTS3SLFDK3VSTAKELKES3EDFSG3G3LL3---W3NV3QDIL3PKG3SLGLITGSEK3SMK3SSLAQDLA3Q
F14    MT3n3iF3nKV3qTAK3hLKE3rED3lin--LKDD3W3lid3tlmP3ssq3aGilv3apfK3SfK3SSLAmhm3Al
P680   MT3n3iF3eKV3qTAK3hLKE3rED3lin--LKDD3W3lid3tlmP3ssq3aGilv3apfK3SfK3SSLAmhm3Al
F12    MT3n3iF3nKV3qTAK3hLKE3rED3lin--LKDD3W3lid3tlmP3ssq3aGilv3apfK3SfK3SSLAmhm3Al
F13    MT3n3iF3nKV3qTAK3hLKE3rED3lin--LKDD3W3lid3tlmP3ssq3aGilv3apfK3SfK3SSLAmhm3Al
R3.4   MT3n3iF3DKV3qTAK3hLKE3rED3lin--LKDD3W3lid3tlmP3ssq3aGilv3apfK3SfK3SSLAmhm3Al

```

```

Eg1      AMALGEPFAGRETTKTNVLFIQNENSRLTEHQRLKGSRRDSPDNLYFLHGGAFKLD3TWKY3
bIBB29  AMALGEPFAGRETTKTNVLFIQNENSRLTEHQRLKGSRRDSPDNLYFLHGGAFKLD3TWKY3
5g1     AMALGEPFAGRETTKTNVLFIQNENSRLTEHQRLKGSRRDSPDNLYFLHGGAFKLD3TWKY3
24tp1  AMALGEPFAGRETTKTNVLFIQNENSRLTEHQRLKGSRRDSPDNLYFLHGGAFKLD3TWKY3
77s    AMALGEPFAGRETTKTNVLFIQNENSRLTEHQRLKGSRRDSPDNLYFLHGGAFKLD3TWKY3
14s    AMALGEPFAGRETTKTNVLFIQNENSRLTEHQRLKGSRRDSPDNLYFLHGGAFKLD3TWKY3
F14    AMALGEPFAGRETTKTNVLFIQNENSRLTEHQRLKGSRRDSPDNLYFLHGGAFKLD3TWKY3
P680   mv3sq3G3lP3ffG3ydT3kr3sktLy3Id3NE3dt3drelnkR3Lr-nk3dta3Ped3Lh3FL3tGG3eF3mLD3----
F12    mv3sq3G3lP3ffG3ydT3kr3sktLy3Id3NE3dt3drelnkR3Lr-nk3dta3Ped3Lh3FL3tGG3eF3mLD3----
F13    mv3sq3G3lP3ffG3ydT3kr3sktLy3Id3NE3dt3drelnkR3Lr-nk3dta3Ped3Lh3FL3tGG3eF3mLD3----
R3.4   mv3sq3G3lP3ffG3ydT3kr3sktLy3Id3NE3dt3drelnkR3Lr-nk3dta3Ped3Lh3FL3tGG3eF3mLD3----

```

```

Eg1      DSQ3GK3HN3VGLRELYNFILEKDIGLVILDPLKDLLEDNDIINANQPMAEVL3RGIT3NLRNT3
bIBB29  DSQ3GK3HN3VGLRELYNFILEKDIGLVILDPLKDLLEDNDIINANQPMAEVL3RGIT3NLRNT3
5g1     DSQ3GK3HN3VGLRELYNFILEKDIGLVILDPLKDLLEDNDIINANQPMAEVL3RGIT3NLRNT3
24tp1  DSQ3GK3HN3VGLRELYNFILEKDIGLVILDPLKDLLEDNDIINANQPMAEVL3RGIT3NLRNT3
77s    DSQ3GK3HN3VGLRELYNFILEKDIGLVILDPLKDLLEDNDIINANQPMAEVL3RGIT3NLRNT3
14s    DSQ3GK3HN3VGLRELYNFILEKDIGLVILDPLKDLLEDNDIINANQPMAEVL3RGIT3NLRNT3
F14    DSQ3GK3HN3VGLRELYNFILEKDIGLVILDPLKDLLEDNDIINANQPMAEVL3RGIT3NLRNT3
P680   DS3----Hh3mn3L3--LY3ey3Ik3En3DI3kf3VIL3Dn3Lmt3mL3rng3DII3yg3kd-fep3mL3Rr3IT3rL3kl3l
F12    DS3----Hh3mn3L3--LY3ey3Ik3dn3DI3kf3VIL3Dn3Lmt3mL3rng3DII3yg3kd-fep3mL3Rr3IT3rL3kl3l
F13    DS3----Hh3mn3L3--LY3ey3Ik3dn3DI3kf3VIL3Dn3Lmt3mL3rng3DII3yg3kd-fep3mL3Rr3IT3rL3kl3l
R3.4   DS3----Hh3mn3L3--LY3ey3Ik3En3DI3kf3VIL3Dn3Lmt3mL3rng3DII3yg3kd-fep3mL3Rr3IT3rL3kl3l

```

```

Eg1      LDM3KHD3KY3VT3FMIVAHARKQAGEQSLTERDFRIIPSHILGATTIP3SWYE3iAFT3MSPK3INS3
bIBB29  LDM3KHD3KY3VT3FMIVAHARKQAGEQSLTERDFRIIPSHILGATTIP3SWYE3iAFT3MSPK3INS3
5g1     LDM3KHD3KY3VT3FMIVAHARKQsGEQSLTERDFRIIPSHILGATTIP3SWYE3iAFT3MSPK3INS3
24tp1  LDM3KHD3KY3VT3FMIVAHARKQAGEQSLTERDFRIIPSHILGATTIPAWYE3vAFT3MSPK3INS3
77s    LDM3KHD3KY3VT3FMIVAHARKQAGEQSLTERDFRIIPSHILGATTIPAWYE3vAFT3MSPK3INS3
14s    LDM3KHD3KY3VT3FMIVAHARKQAGEQSLTERDFRIIPSHILGATTIPAWYE3vAFT3MSPK3INS3
F14    LDM3KHD3KY3VT3FMIVAHARKQAGEQSLTERDFRIIPSHILGATTIPAWYE3vAFT3MSPK3INS3
P680   f3-----qd3VTF3l3lVAH3An3Ks3Ayan3S3mddkaymvk3PS3da3LG3gs3Tlt3AW3eF3m3lml3SPK3--r
F12    f3-----qd3VTF3l3lVAH3An3Ks3Ayan3S3mddkaymvk3PS3da3LG3gs3Tlt3AW3eF3m3lml3SPK3--r
F13    f3-----qd3VTF3l3lVAH3An3Ks3Ayan3S3mddkaymvk3PS3da3LG3gs3Tlt3AW3eF3m3lml3SPK3--r

```

R3.4 f-----qdVTFllVAHANksAyanSmddkaymvkPSdaLGgsTltAWaEFmlmlSPK--r

Eg1 KTKNrYSIMKVFARNFAFNDEILWGYVGSFAFTSIEQDKKEPDSELVEKVKRETPIETTKE  
bIBB29 KTKNrYSIMKVFARNFAFNDEILWGYVGSFAFTSIEQDKKEPDSELVEKVKRETPIETTKE  
5g1 KTKNrYSIMKVFARNFAFNnEILWGYVGSFAFTSIEQDKKEPDSELVEKVKRETPIETTKE  
24tp1 KTKNgYSIMKVFARNFAFNnEILWGYVGSvFTSIEQDKKEPDSELiEeVKqETPIETTKE  
77s KTKNgYSIMKVFARNFAFNnEILWGYVGSFAFTSIEQDKKEPDSELVEKVKRETPIETTKE  
14s KTKNgYSIMKVFARNFAFNnEILWGYVGSFAFTSIEQDKKEPDSELVEKVKRETPIETTKE  
F14 KTKNgYSIMKVFARNFAFNnEILWGYVGSFAFTSIEQDKKEPDSELVEKVKRETPIETTKE  
P680 gkhNdfSklsVkarGyqFdDdlfnsYVdSvFTcvnksKKEPDSELiEeVKqETPIETTKE  
F12 gkyNdfSklsVkarGyqFdDdlfnsYVdSvFTcvnksKKEPDSELVEKVKRETPIETTKE  
F13 gkyNdfSklsVkarGyqFdDdlfnsYVdSvFTcvnksKKEPDSELVEKVKRETPIETTKE  
R3.4 gkhNdfSklsVkarGyqFdDdlfnsYVdSvFTcvnksKKEPDnELVEKVKaETPIETTKE

Eg1 SAQAFDLAKEQGKVIEND  
bIBB29 SAQAFDLAKEQGKVIEND  
5g1 SAQAFDLAKEQGKVIEND  
24tp1 SAQAFDLAKEQGKVIEND  
77s SAQAFDLAKEQGKVIEND  
14s SAQAFDLAKEQGKVIEND  
F14 SAQAFDLAKEQGKVIEND  
P680 SAQAFDLAKEQGKVtEND  
F12 SAQAFDLAKEQGKVIEND  
F13 SAQAFDLAKEQGKVIEND  
R3.4 SAQAFDLAKEQGKVIEND

**Supplementary Figure S2.** Identification of transmembrane domains of the putative holins of *Lactococcus* phages sequenced in this study. Prediction of transmembrane domains was performed using the TMHMM tool (Krogh et al., 2001).

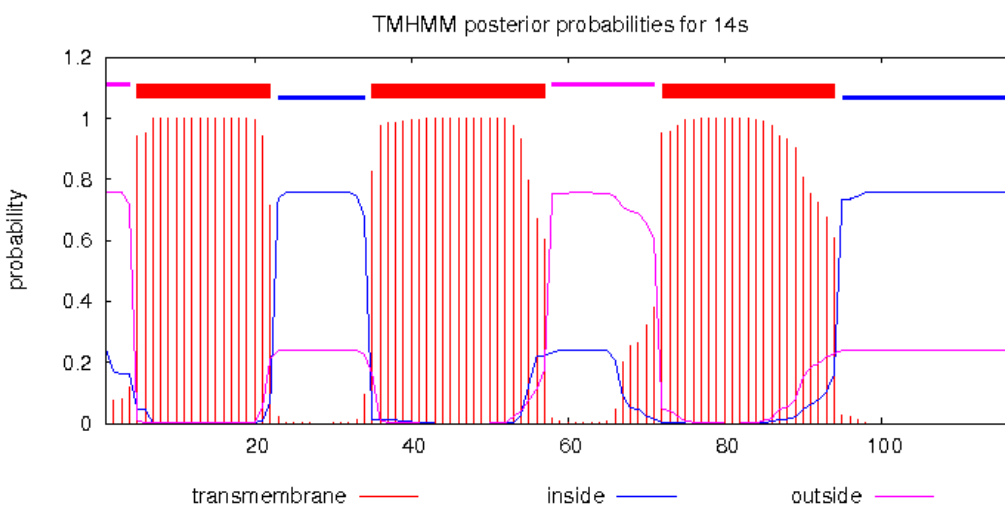

**Supplementary Figure S3.** Multiple sequence alignment of receptor binding proteins (RBPs) of

*Lactococcus* phages sequenced in this study with protein representative of 936-type RBP

subgroups recognized by Murphy et al. (2016). Similar residues are coloured according to their conservation based on BLOSUM62 scoring (max: 3.0, light blue; min: 0.5, grey).

```
645 MTIKkFTFFSPNGTEFPVsANaDAKLYMLLSEKDYSQFliRHWETPINTALNRIYTNTSL
340 MTIKkFTFFSPNGTEFPVsANaDAKLYMLLSEKDYSQFliRHWETPINTALNRIYTNTSL
P475 MTIKkFTFFSPNGTEFPVsANaDAKLYMLLSEKDYSQFslRHWETPINTALNRIYkNTSL
77s MTIKNFTFFSPNGTEFPVGANNDAKLYMLLSEKDYSQFslRHWETPINTdLNRIYkNTSL
bIBB29 MTIKNFTFFSPNGTEFPVGANNDAKLYMLLSEKDYSQFslRHWETPINTALNRIYkNTSL
24tp1 MTIKNFTFFSPNGTEFPVGANNDAKLYMLLSEKDYSQFslRHWETPINTALNRIYkNTSL
5g1 MTIKNFTFFSPNGTEFPVGANNDAKLYMLLSEKDYSQFslRHWETPINTALNRIYkNTSL
F12 MTIKNFTFFSPNGTEFPVGANNDAKLYMLLSEKDYSQFslRHWETPINTALNRIYkNTSL
F13 MTIKNFTFFSPNGTEFPVGANNDAKLYMLLSEKDYSQFslRHWETPINTALNRIYkNTSL
F14 MTIKNFTFFSPNGTEFPVGANNDAKLYMLLSEKDYSQFslRHWETPINTALNRIYkNTSL
Eg1 MTIKNFTFFSPNGTEFPVGANNDAKLYMLLSEKDYSQFslRHWETPINTALNRIYkNTSL
14s MTIKNFTFFSPNGTEFPVGANNDAKLYMLLSEKDYSQFslRHWETPINTALNRIYkNTSL
936 MTIKNFTFFSPNGTEFPVGSNNDgKLYMmLtgmDYktiRRkdWlTptNsgLNvIYnNTSi
sk1 MTIKNFTFFSPNsTEFPVGSNNDgKLYMmLtgmDYrtiRRkdWssPlNTALNvqYTNTSi
p2 MTIKNFTFFSPNsTEFPVGSNNDgKLYMmLtgmDYrtiRRkdWssPlNTALNvqYTNTSi
712 MTIKNFTFFSPNGTEFPVGSNNDAKLYMmLtgmDYktiRRkdWvePlNTsLNvMYpNTSi
PhiC0139 MTIKNFTFFSPNGTEFPVGSNNDgKLYMmLtgmDYgtiRRkdWssPlNTALNvqYTNTSi
ASCC281 MTIKNFTFFSPNGTEFPVGSNNDgKLYMmLtgmDYgtiRRkdWssPlNiALNvqYTNTSi
P008 MTIKNFTFFSPNGTEFPVGSNNDgKLYMmLtgmDYgtiRRkdWtsPlNTALNvqYTNTSi
P113g MTIKNFTFFSPNGTEFPVGSNNDgKLYMmLagmDYgtiRRkdWtsPlNTALNvqYTNTSi
bIL170 MTIKNFTFFSPNGTEFPVGSNNDgKLYMmLagmDYgtiRRkdWtsPlNTALNvqYTNTSi
PhiL.6 MTIKNFTFFSPNGTEFPVGSNNDgKLYMmLtgmDYgtiRRkdWtsPlNTALNvqYTNTSi
Phi155 MTIKyFTFFSPNnTEFPVGSNNDAKLYMmLtgmDYgtiRRkdWsaPVNTALNvqYTNTSi
```

```
645 LVGGRYFELYNEAVALNSNATNFVHANIDISNvTNPVTiSVETSsnNSNkVDINTGVGVLK
340 LVGGRYFELYNEAVALNSNATNFVHANIDISNvTNPVTiSVETSsnNSNkVDINTGVGVLK
P475 LVGGRYFELYdEAVALNSNATNFVHANIDISNaTNPVTmSVETSdNSNQVDINTGVGVLK
77s LVGGRYFELYNEAVALNSNATNFVHANIDISNaTNPVTmSVETSdNSNQVDINTGVGVLK
bIBB29 LVGGRYFELYNEAVALNSNATNFVHANIDISNaTNPVTmSVETSdNSNQVDINTGVGVLK
24tp1 LVGGRYFELYNEAVALNSNATNFVHANIDISNaTNPVTmSVETSdNSNQVDINTGVGVLK
5g1 LVGGRYFELYNEAVALNSNATNFVHANIDISNaTNPVTmSVETSdNSNQVDINTGVGVLK
F12 LVGGRYFELYNEAVALNSNATNFVHANIDISNaTNPVTmSVETSdNSNQVDINTGVGVLK
F13 LVGGRYFELYNEAVALNSNATNFVHANIDISNaTNPVTmSVETSdNSNQVDINTGVGVLK
F14 LVGGRYFELYNEAVALNSNATNFVHANIDISNaTNPVTmSVETSdNSNQVDINTGVGVLK
Eg1 LVGGRYFELYNEAVALNSNATNFVHANIDISNaTNPVTmSVETSdNSNQVDINTGVGVLK
14s LVGGRYFELYNEAVALNSNATNFVHANIDISNaTNPVTmSVETSdNSNQVDINTGVGVLK
936 iaGGRYFELsfEtVALNaNsvNyiHANIDltqTTrPVsLSaEkSDNSNsVDlNnaLGVLK
sk1 iaGGRYFELlNetVALkgNAvNyiHANIDltrTanPVsLSaETSsnNSNgVDInNsGVLK
p2 iaGGRYFELlNetVALkgdsvNyiHANIDltqTanPVsLSaETanNSNgVDInNsGVLK
712 iaGGRYFELlsEtVALkaNsvNyiHANIDltkTanPVsLSaEnvDNSNnVdfNnrsGVLK
PhiC0139 iaGGRYFELsNetVALkpNsvNyiHANIDltqTThPVsLSaEnSnNSNnVDlNnnsGVLK
ASCC281 iaGGRYFELsNetVALkpNsvNyiHANIDlSqTThPVsLSaETaDdSNnVDlNnnsGVLK
P008 iaGGRYFELsNetVALkaNsvNyiHANIDltqTahPVTLsaETSsnNSNnVDlNnnsGVLK
P113g iaGGRYFELlNetVALkgNAvNyiHANIDltqTahPVTLsaETSdNSNnVDlNnnsGVLK
bIL170 iaGGRYFELlNetVALkgNAvNyiHANIDltqTahPVTLsaETSsnNSNnVDlNnnsGVLK
PhiL.6 iaGGRYFELsNetVALkgNsvNyiHANIDltqTahPVsLSaETinNSNhVDlNnssGVLK
```

Phi155 iaGGRYFELvgEtipLkaNsvNyiHANIDltqTTsPVkLSaETlnNSNrtDINnssGVLK

645 KCIEVVETNAiGVSAVTKPSGSSILEKIYP---VGAYYfSSQPTEPATLF-----GFGT  
340 KCIEVVETNAiGVSAVTKPSGSSILEKIYP---VGAYYfSSQPTEPATLF-----GFGT  
P475 KCIEVVETNAMGVSAVTKPSGSSiiEKIYP---VGAYYLSSQPTEPATLF-----GFGT  
77s KCIEVVETNAMGVSAVTKPSGSSiiEKIYP---VGAYYLSSQPTEPATLF-----GFGT  
bIBB29 KCIEVVETNAMGVSAVTKPSGSSiiEKIYP---VGAYYLSSQPTEPATLF-----GFGT  
24tp1 KCIEVVETNAMGVSAVTKPSGSSiiEKIYP---VGAYYLSSQPTEPATLF-----GFGT  
5g1 KCIEVVETNAMGVSAVTKPSGSSiiEKIYP---VGAYYLSSQPTEPATLF-----GFGT  
F12 KCIEVVETNAMGVSAVTKPSGSSiiEKIYP---VGAYYLSSQPTEPATLF-----GFGT  
F13 KCIEVVETNAMGVSAVTKPSGSSiiEKIYP---VGAYYLSSQPTEPATLF-----GFGT  
F14 KCIEVVETNAMGVSAVTKPSGSSiiEKIYP---VGAYYLSSQPTEPATLF-----GFGT  
Eg1 KCIEVVETNAMGVSAVTKPSGSSiiEKIYP---VGAYYLSSQPTEPATLF-----GFGT  
14s KCIEVVETNAMGVSAVTKPSGSSiiEKIYP---VGAYYLSSQPTEPATLF-----GFGT  
936 vlIdirtTNgtVTLqkaPdnvtyLdKav-----InsiisSStvdsgqvktAtinTGHGr  
sk1 vCfdiVtTsgtGVTstktptvqTStLdsIs-----VndmtvSgsidvPvqtl-tveAGnGl  
p2 vCfdiVtTsgtGVTstkpivqTStLdsIs-----VndmtvSgsidvPvqtl-tveAGnGl  
712 vlIdirtTdgMGVisekaPdnityLdKVv-----InsisttSgvlDi-----GnGv  
PhiC0139 vvIdirtTNgiGVisdktPdnvtyLdKVi-----tnsleMkgfadsyisIF-----StaGd  
ASCC281 vvIdirtTNgtGVintktPdnvtyLdKVi-----tnsleMkgfadsyvafFANK--GgGn  
P008 vvIdirtTNgtGVinaksPtehtLLddVi-----Ins--LvnkkdiPwTdl-NrASGvGs  
P113g vvIdirtTNgtGVinakQptehtLLddVi-----Ins--LvnQkdvPwTdl-NrAgGvGs  
bIL170 vvIdirtTNgtGVisaeQptehtLLddVi-----Ins--LvnkkdiPwTdl-NrASGvGs  
PhiL.6 vlIdirtTNGLGVisseiPkqittLdelatKTAKIedltvkgdikgwtsVs----mqnva  
Phi155 vlIdirtTNGLGVisseiPkqittLdelatKTANledltvkgdikgwtsVs----mqnva

645 WSRVKGRGLvGVD-ESDSALsSGGKQG-----GS-----TNPLSQHTITPSSGQFVVARG  
340 WSRVKGRGLvGVD-ESDSALsSGGKQG-----GS-----TNPLSQHTITPSSGQFVVARG  
P475 WSRVKGRGLvGVD-ESDSALsSGGKQG-----GS-----TNPLSQHTITPSSGQFVVARG  
77s WSRVKGRGLvGVD-ESDSALsSGGKQG-----GS-----TNPLSQHTITPSSGQFVVARG  
bIBB29 WSRVKGRGLvGVD-ESDSALsSGGKQG-----GS-----TNPLSQHTITPSSGQFVVARG  
24tp1 WSRVKGRGLvGVD-ESDSALsSGGKQG-----GS-----TNPLSQHTITPSSGQFVVARG  
5g1 WSRVKGRGLvGVD-ESDSALsSGGKQG-----GS-----TNPLSQHTITPSSGQFVVARG  
F12 WSRVKGRGLvGVD-ESDSALsSGGKQG-----GS-----TNPLSQHTITPSSGQFVVARG  
F13 WSRVKGRGLvGVD-ESDSALsSGGKQG-----GS-----TNPLSQHTITPSSGQFVVARG  
F14 WSRVKGRGLvGVD-ESDSALsSGGKQG-----GS-----TNPLSQHTITPSSGQFVVARG  
Eg1 WSRVKGRGLvGVD-ESDSALsSGGKQG-----GS-----TNPLSQHTITPSSGQFVVARG  
14s WSRVKGRGLvGVD-ESDSALsSGGKQG-----GS-----TNPLSQHTITPSSGQFVVARG  
936 sAvItriGntvti-tSqSqsSepanG-----sw-----ergvStlpVg-----FrpAte  
sk1 dlQltkknndlVi--vrffgSvsniQk-----GwNM---sgtwvdrpfrPavvQsLV---  
p2 qlQltkknndlVi--vrffgSvsniQk-----GwNM---sgtwvdrpfrPaAvQsLV---  
712 tfswq-kkadiVE-----fhwGGRltsins-GAsfpvkapfqlipdkvkelv-----  
PhiC0139 titItapwdctaE--vElfyhgwGygGGeWEIGi-----IngSNGvtktyei  
ASCC281 tvtftapwdctaE-velfyhgwG-ygGGeWEIGi-----TtPsgltqIyeaT  
P008 tgilqaRiInsViYvrgNsipvpnvap-----nf-----ivPvg--TfpPafGtnLpqfd  
P113g tgtlqaRiInGViYvrgNsipvpnvap-----nf-----ivPvg--TfpPafGtnLpqfd  
bIL170 tgilqaRiInGViYvrgNsipvpnvap-----nf-----ivPvg--TfpPafGtnLpqfd  
PhiL.6 sAtlqykkInGVi-clrgsgnwGafka-----nS-----Tkvvg--sLpPevrptdntqf  
Phi155 sAtlqykkInGai-clrgsgnwGafka-----nS-----Tkvvg--sLpPevrptdntqf

645 AGnrHWSSGGAPSNSYAMDTENGGV--TVGDNTNHNNWQPFEAAYIWKRIN-----  
340 AGnrHWSSGGAPSNSYAMDTENGGV--TVGDNTNHNNWQPFEAAYIWKRIN-----  
P475 AGnrHWSSGGAPSNSYAMDTENGGV--iVGDNTNHNNWQPFEAAYIWKRIN-----  
77s AGKWHWSSGGAPSNSYAMDTENGGI--TVGDNTNHNNWQPFEAAYIWKRIN-----  
bIBB29 AGKWHWSSGGAPSNSYAMDTENGGV--TVGDNTNHNNWQPFEAAYIWKRIN-----  
24tp1 AGKWHWSSGGAPSNSYAMDTENGGV--TVGDNTNHNNWQPFEAAYIWKRIN-----  
5g1 AGKWHWSSGGAPSNSYAMDTENGGV--TVGDNTNHNNWQPFEAAYIWKRIN-----

```

F12      AGKWHWSSGGAPSNSYAMDTENGGI--TVGDNTNHNNWQPFEAAYIWKRIN-----
F13      AGKWHWSSGGAPSNSYAMDTENGGI--TVGDNTNHNNWQPFEAAYIWKRIN-----
F14      AGKWHWSSGGAPSNSYAMDTENGGI--TVGDNTNHNNWQPFEAAYIWKRIN-----
Eg1      AGKWHWSSGGAPSNSYAMDTENGGI--TVGDNTNHNNWQPFEAAYIWKRIN-----
14s      AGKWHWSSGGAPSNSYAMDTENGGI--TVGDNTNHNNWQPFEAAYIWKRIN-----
936      tliYnhdltipskfSwllhtNGLI-----DlfsngN--ikttdYIltsgqFwiTkdkLpe
sk1      ---gHfAg---rdtSFhiDinpnGsitwwGESidntp--iatrgngsyfIk-----
p2       ---gHfAg---rdtSFhiDinpnGsitwwGaNidktp--iatrgngsyfIk-----
712      ---gHfpt---tSNSFhiDlEhdGtfrwwGEDkas---gsvrgtamyfIk-----
PhiC0139 t--gy--tkGhdSqaiAMpTsaGftglkkGqqytfNk--rdvsgraggatrvkiiVkJyrN
ASCC281  ---gytNghnSqalampakaiysGL--kkGqqytfdk--rdasglaggskhemmiVkJyrN
P008     ta-gtfyShGnlSlSl-inmspsGI--aVGn-----PnntsmngKtIsFvLSVPLL--
P113g    ta-gtfySpGhlSlSl-inmspsGI--aVGn-----PnntsmngKtIsFaLSaPLL--
bIL170   ss-gtfyShGnlSlSl-inmspsGI--aVGn-----PnntsmngKtIsFaLSaPLL--
PhiL.6   emttqrAnnnnkpmelliDTngtis--vwsysags---gnyggvVgtyfq-----
Phi155   emttqrAnnnnkpmelqiDTngtis--vwsysags---gnyggvVgtyfq-----

```

**Supplementary Figure S4.** Maximum-likelihood phylogenetic tree of receptor binding proteins (RBPs) of *Lactococcus* phages sequenced in this study. RBP phylogenies were reconstructed from multiple alignment of complete protein sequences, which were generated using MUSCLE with 8 iterations (default settings). A maximum-likelihood tree was constructed using PHYML and the Junker-Castor substitution model with 100 bootstrap resamplings. The scale bar represents evolutionary distance. Consensus support (%) is marked at each node.

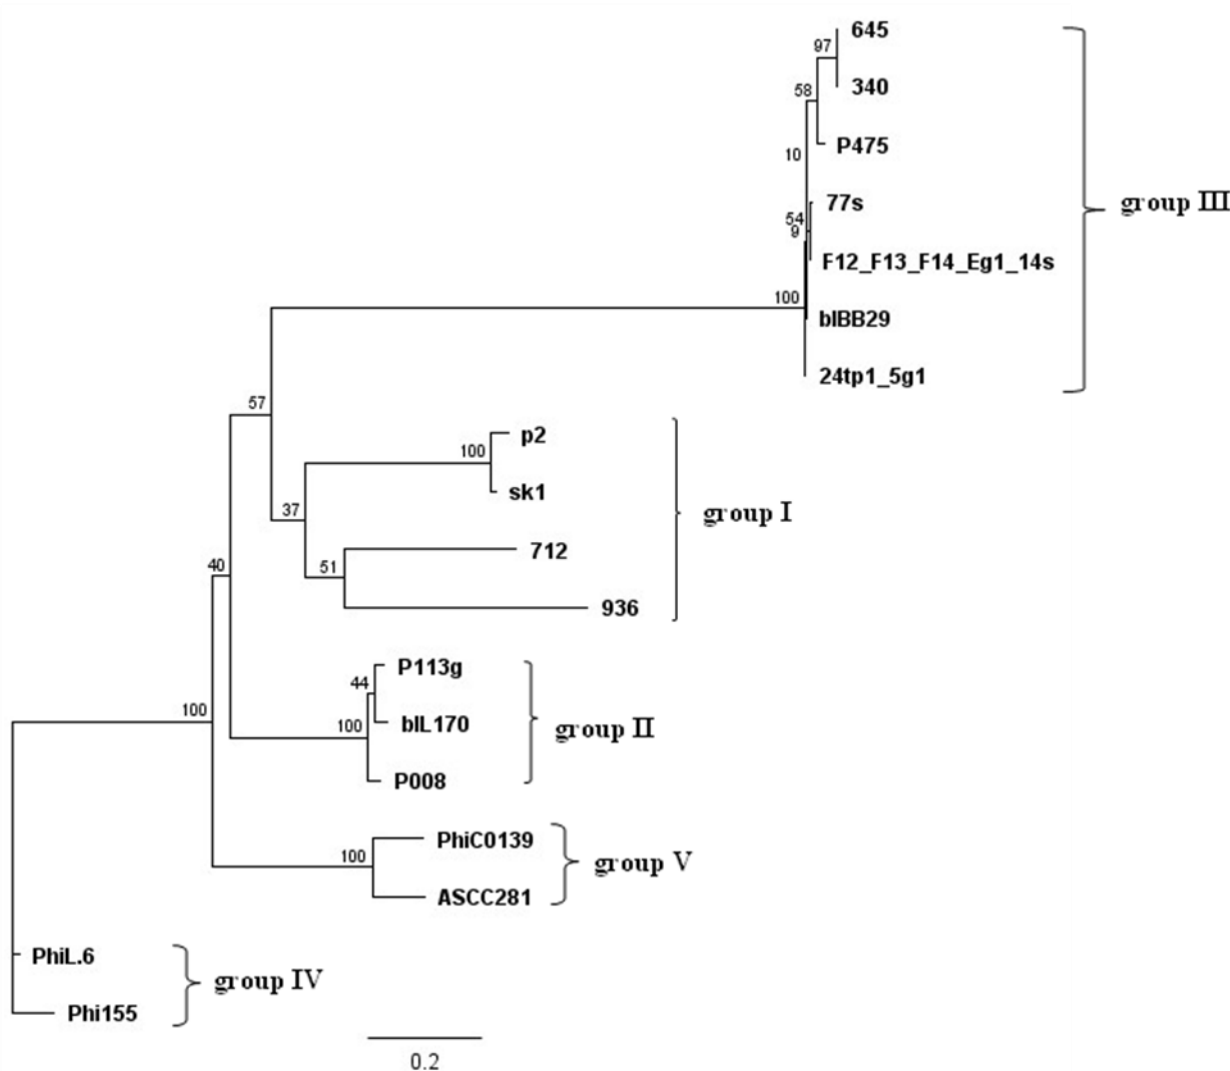

**Supplementary Figure S5.** Multiple sequence alignment of putative TpeX proteins of *Lactococcus* phages sequenced in this study with the TpeX identified in other 936-type phages (Murphy et al., 2016). Similar residues are coloured according to their conservation based on BLOSUM62 scoring (max: 3.0, light blue; min: 0.5, grey).

```

Phi145      -----mLNf-----SsgvtfGkhygwpagtatpsKnraysqkvkvtvpndqytisA
Phi93       -----mLNf-----SsgvtfGkhygwpagtatpsKnraysqkvkvtvpndqytisA
Eg1         MTVYPNLNLLKNRTRTTSATSTSSAWGTLFSSEQIYDSAIAKSKTGVSAMTLGF DVSVPLNA
24tp1      MTVYPNLNLLKNRTRTTSATSTSSAWGTLFSSEQIYDSAIAKSKTGVSAMTLGF DVSVPLNA
F14        MTVYPNLNLLKNRTRTTSATSTSSAWGTLFSSEQIYDSAIAKSKTGVSAMTLGF DVSVPLNA
5g1        MTVYPNLNLLKNRTRTTSATSTSSAWGTLFSSEQIYDSAIAKSKTGVSAMTLGF DVSVPLNA
F12        MTVYPNLNLLKNRTRTTSATSTSSAWGTLFSSEQIYDSAIAKSKTGVSAMTLGF DVSVPLNA
F13        MTVYPNLNLLKNRTRTTSATSTSSAWGTLFSSEQIYDSAIAKSKTGVSAMTLGF DVSVPLNA
77s        -----NLLKNRTRTTSATSTSSAWGTLFSSEQIYDSAIAKSKTGVSAMTLGF DVSVPLNA
14s        MTVYPNLNLLKNRTRTTSATSTSSAWGTLFSSEQIYDSAIAKSKTGVSAMTLGF DVSVPLNA

Phi145      dwkNanwlsiyGftnegdttavAr-ygsanGtGTGSwdsnfvggytaandmtftVpdnvn
Phi93       dwkNanwlsiyGftnegdttavAr-ygsanGtGTGSwdsnfvggytaandmtftVpdnvn
Eg1         KVGNNISVQLKGQNSQAHGNV GANDFNTIVGE---KWHNIEQSDLGKkIRLSTSVELDPK
24tp1      KVGNNISVQLKGQNSQAHGNV GANDFNTIVGE---KWHNIEQSDLGKkIRLSTSVELDPK
F14        KVGNNISVQLKGQNSQAHGNV GANDFNTIVGE---KWHNIEQSDLGKkIRLSTSVELDPK
5g1        KVGNNISVQLKGQNSQAHGNV GANDFNTIVGE---KWHNIEQSDLGKkIRLSTSVELDPK
F12        KVGNNISVQLKGQNSQAHGNV GANDFNTIVGE---KWHNIEQSDLGKkIRLSTSVELDPK
F13        KVGNNISVQLKGQNSQAHGNV GANDFNTIVGE---KWHNIEQSDLGKkIRLSTSVELDPK
77s        KVGNNISVQLKGQNSQAHGNV GANDFNTIVGE---KWHNIEQSDLGKkIRLSTSVELDPK
14s        KVGNNISVQLKGQNSQAHGNV GANDFNTIVGE---KWHNIEQSDLGKkIRLSTSVELDPK

Phi145      YivasyAskspDtlTlq-----GllngKpKLEqGSkvTPWmrSSSEtiesDYPSYIGnY
Phi93       YivasyAskspDtlTlq-----GllngKpKLEqGSkvTPWmrSSSEtiesDYPSYIGnY
Eg1         YqSFDALADTDSITIRQVEGTPGLVYSKLEPGSTDPWIPSSSEVTAEDYPSYIGTY
24tp1      YqSFDALADTDSITIRQVEGTPGLVYSKLEPGSTDPWIPSSSEVTAEDYPSYIGTY
F14        YHSFDALADTDSITIRQVEGTPGLVYSKLEPGSTDPWIPSSSEVTAEDYPSYIGTY
5g1        YHSFDALADTDSITIRQVEGTPGLVYSKLEPGSTDPWIPSSSEVTAEDYPSYIGTY
F12        YHSFDALADTDSITIRQVEGTPGLVYSKLEPGSTDPWIPSSSEVTAEDYPSYIGTY
F13        YHSFDALADTDSITIRQVEGTPGLVYSKLEPGSTDPWIPSSSEVTAEDYPSYIGTY
77s        YHSFDALADTDSITIRQVEGTPGLVYSKLEPGSTDPWIPSSSEVTAEDYPSYIGTY
14s        YHSFDALADTDSITIRQVEGTPGLVYSKLEPGSTDPWIPSSSEVTAEDYPSYIGTY

Phi145      TgKivdgQSTDPvrYnWKKIE
Phi93       TgKivdgQSTDPvrYnWKKIE
Eg1         TDKNSNEQSTDPEKYTWKKIE
24tp1      TDKNSNEQSTDPEKYTWKKIE
F14        TDKNSNEQSTDPEKYTWKKIE
5g1        TDKNSNEQSTDPEKYTWKKIE
F12        TDKNSNEQSTDPEKYTWKKIE
F13        TDKNSNEQSTDPEKYTWKKIE
77s        TDKNSNEQSTDPEKYTWKKIE
14s        TDKNSNEQSTDPEKYTWKKIE

```



**Supplementary Figure S6.** Maximum-likelihood phylogenetic tree of MTP extension of *Lactococcus* phages sequenced in this study with the MTP extensions identified in other 936-type phages (Murphy et al., 2016). MTP extension phylogenies were reconstructed from multiple alignment of major tail protein extension sequences generated using MUSCLE with 8 iterations (default settings). A maximum-likelihood tree was built using PHYML and the Junker-Castor substitution model with 100 bootstrap resamplings. The scale bar represents evolutionary distance. Consensus support (%) is marked at each node.

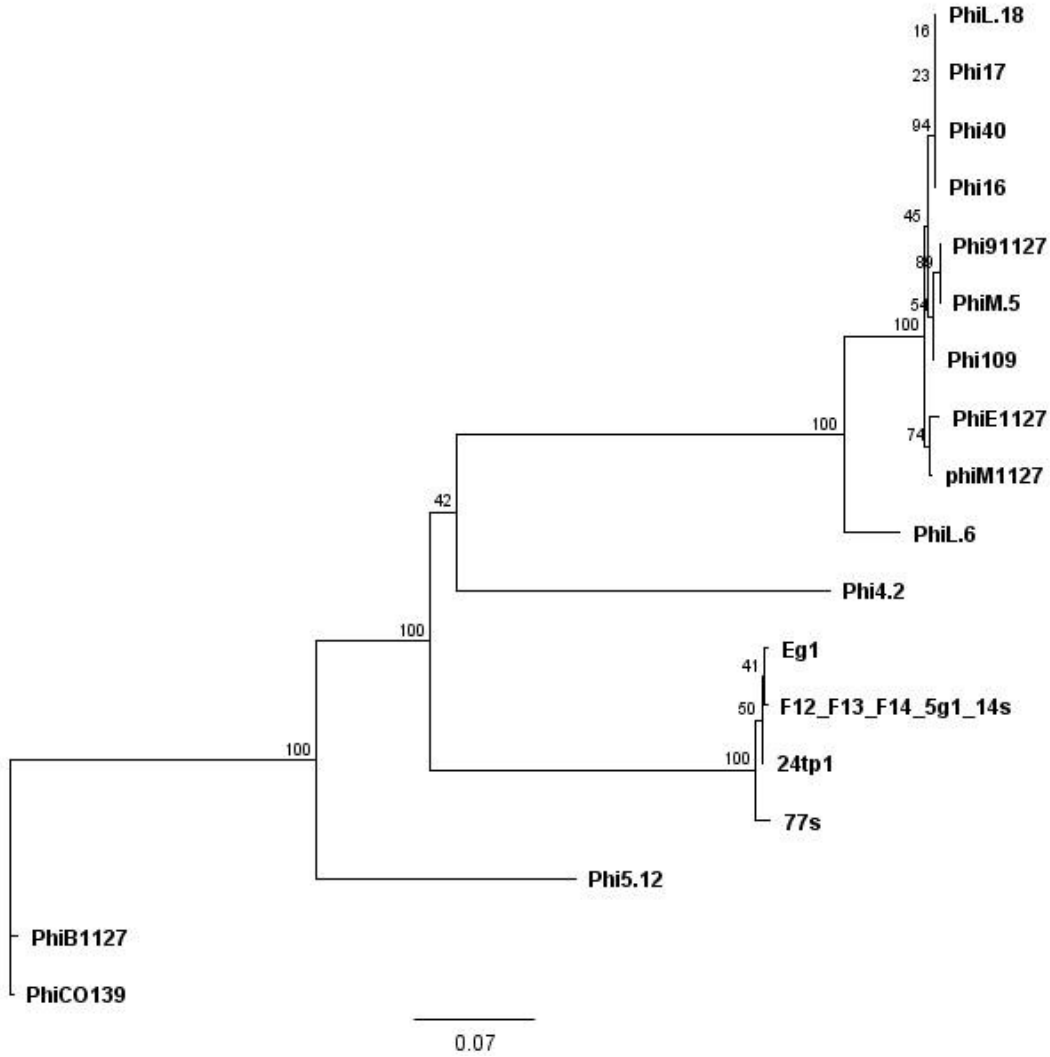

## References

Krogh, A., Larsson, B., von Heijne, G. & Sonnhammer, E. L. L. Predicting transmembrane protein topology with a hidden Markov model: Application to complete genomes. *J. Mol. Biol.* **305**, 567-580 (2001).

Murphy, J. et al. Comparative genomics and functional analysis of the 936 group of lactococcal *Siphoviridae* phages. *Sci. Rep.* **6**, 21345 (2016).

## Supplementary Tables.

**Supplementary Table S1.** Host range studies of *Lactococcus* phages sequenced in this study tested on industrial, laboratory and environmental *L. lactis* strains. Grey-shaded boxes indicate clear plaques; light grey boxes indicate turbid plaques formed on the specified strains.

|                                                                       | Bacteriophages |     |     |     |     |     |     |       |
|-----------------------------------------------------------------------|----------------|-----|-----|-----|-----|-----|-----|-------|
|                                                                       | Eg1            | F12 | F13 | F14 | 5g1 | 14s | 77s | 24tp1 |
| <b>Industrial strains</b>                                             |                |     |     |     |     |     |     |       |
| <i>L. lactis</i> subsp. <i>cremoris</i>                               |                |     |     |     |     |     |     |       |
| IBB694                                                                |                |     |     |     |     |     |     |       |
| IBB695                                                                |                |     |     |     |     |     |     |       |
| IBB696                                                                |                |     |     |     |     |     |     |       |
| IBB697                                                                |                |     |     |     |     |     |     |       |
| IBB698                                                                |                |     |     |     |     |     |     |       |
| IBB699                                                                |                |     |     |     |     |     |     |       |
| IBB700                                                                |                |     |     |     |     |     |     |       |
| IBB1788                                                               |                |     |     |     |     |     |     |       |
| IBB1789                                                               |                |     |     |     |     |     |     |       |
| IBB1790                                                               |                |     |     |     |     |     |     |       |
| IBB1791                                                               |                |     |     |     |     |     |     |       |
| IBB1792                                                               |                |     |     |     |     |     |     |       |
| <i>L. lactis</i> subsp. <i>lactis</i>                                 |                |     |     |     |     |     |     |       |
| IBB743                                                                |                |     |     |     |     |     |     |       |
| IBB749*                                                               |                |     |     |     |     |     |     |       |
| IBB750*                                                               |                |     |     |     |     |     |     |       |
| IBB752                                                                |                |     |     |     |     |     |     |       |
| IBB753                                                                |                |     |     |     |     |     |     |       |
| IBB754                                                                |                |     |     |     |     |     |     |       |
| IBB757                                                                |                |     |     |     |     |     |     |       |
| IBB758                                                                |                |     |     |     |     |     |     |       |
| IBB759                                                                |                |     |     |     |     |     |     |       |
| IBB761                                                                |                |     |     |     |     |     |     |       |
| IBB763                                                                |                |     |     |     |     |     |     |       |
| IBB764                                                                |                |     |     |     |     |     |     |       |
| IBB1784                                                               |                |     |     |     |     |     |     |       |
| IBB1796                                                               |                |     |     |     |     |     |     |       |
| <i>L. lactis</i> subsp. <i>lactis</i><br>biovar. <i>diacetylactis</i> |                |     |     |     |     |     |     |       |

IBB734\*  
IBB735\*  
IBB736\*  
IBB737\*  
IBB738\*  
IBB742  
IBB744  
IBB745  
IBB746  
IBB747  
IBB748\*  
IBB751\*  
IBB755  
IBB756  
IBB760  
IBB762  
IBB1286\*

---

**Natural isolates**

---

*L. lactis* subsp. *cremoris*

IBB338  
IBB339  
IBB340  
IBB341  
IBB342  
IBB704

---

*L. lactis* subsp. *lactis*

10LC

---

other *Lactococcus* species

*L. garvieae* 3LC  
*L. plantarum* 76B  
*L. laudensis* 115  
*L. raffinolactis* 87B

---

**Laboratory strains**

---

*L. lactis* subsp. *cremoris*

LM0230  
MG1363  
IBB477  
NZ9000

---

*L. lactis* subsp. *lactis*  
biovar. *diacetylactis*

IL1403

F7/2

\*The industrial starter strains used at the time of whey sample collection.
